# Supplementary material for: Neuregulin 4 Downregulation Induces Insulin Resistance in 3T3-L1 Adipocytes through Inflammation and Autophagic Degradation of GLUT4 Vesicles
Source: MDPI journal article supplement (doi:10.3390/ijms222312960), 2021-11-30
Supplement: s1 [file s1]

# Neuregulin 4 downregulation induces insulin resistance in 3T3-L1 adipocytes through inflammation and autophagic degradation of GLUT4 vesicles

Francisco Díaz-Sáez <sup>1,2</sup>, Carla Blanco-Sinfreu <sup>1</sup>, Adrià Archilla-Ortega <sup>1</sup>, David Sebastian <sup>1,3,4</sup>, Montserrat Romero <sup>1,3,4</sup>, Maria Isabel Hernández-Alvarez <sup>1,2,3</sup>, Sílvia Mora <sup>1,2</sup>, Xavier Testar <sup>1,2,3</sup>, Wifredo Ricart <sup>5,6,7</sup>, José Manuel Fernández-Real <sup>5,6,7</sup>, José María Moreno-Navarrete <sup>5,6,7</sup>, Julián Aragonés <sup>8,9</sup>, Marta Camps <sup>1,2,3</sup>, Antonio Zorzano <sup>1,3,4,\*</sup> and Anna Gumà <sup>1,2,3,\*</sup>

<sup>1</sup> Department of Biochemistry and Molecular Biomedicine, Faculty of Biology, University of Barcelona, Av. Diagonal, 643, Barcelona, Spain, 08028; frandiazsaez@gmail.com (F.D.-S.); carlablancosinfreu@outlook.com (C.B.-S.); adria.archilla.ortega@gmail.com (A.A.); mihernandez@ub.edu (M.I.H.-A.); smora@ub.edu (S.M.); xtestar@ub.edu (X.T.); martacamps@ub.edu (M.C.)

<sup>2</sup> Institute of Biomedicine of the University of Barcelona (IBUB), Barcelona, Spain, 08028

<sup>3</sup> Centro de Investigación Biomédica en Red Diabetes y Enfermedades Metabólicas Asociadas (CIBERDEM), Carlos III Health Institute, Madrid, Spain, 28029; david.sebastian@irbbarcelona.org (D.S.); montserrat.romero@irbbarcelona.org (M.R.)

<sup>4</sup> Institute for Research in Biomedicine (IRB Barcelona), Barcelona Institute of Science and Technology (BIST), Barcelona, Spain, 08028

<sup>5</sup> Department of Medicine, Universitat de Girona, Carrer Emili Grahit, 77, Girona, Spain, 17071; wricart@idibgi.org (W.R.); jmfreal@idibgi.org (J.M.F.-R.); jmoreno@idibgi.org (J.M.M.-N.)

<sup>6</sup> Department of Diabetes, Endocrinology and Nutrition, Institut d'Investigació Biomèdica de Girona (IDIBGI), Carrer del Dr. Castany, s/n, Salt, Spain, 17190

<sup>7</sup> Centro de Investigación Biomédica en Red Fisiopatología de la Obesidad y Nutrición (CIBEROBN), Carlos III Health Institute, Madrid, Spain, 28029

<sup>8</sup> Research Unit, Hospital of Santa Cristina, Research Institute Princesa, Autonomous University of Madrid, c/Maestro Vives, 2, Madrid, Spain, 28009; jaragones.hlpr@salud.madrid.org

<sup>9</sup> Centro de Investigación Biomédica en Red Enfermedades Cardiovasculares, Carlos III Health Institute, Madrid, Spain, 28029

\* Correspondence: antonio.zorzano@irbbarcelona.org (A.Z.); aguma@ub.edu (A.G.)

## Supplementary Figure S1

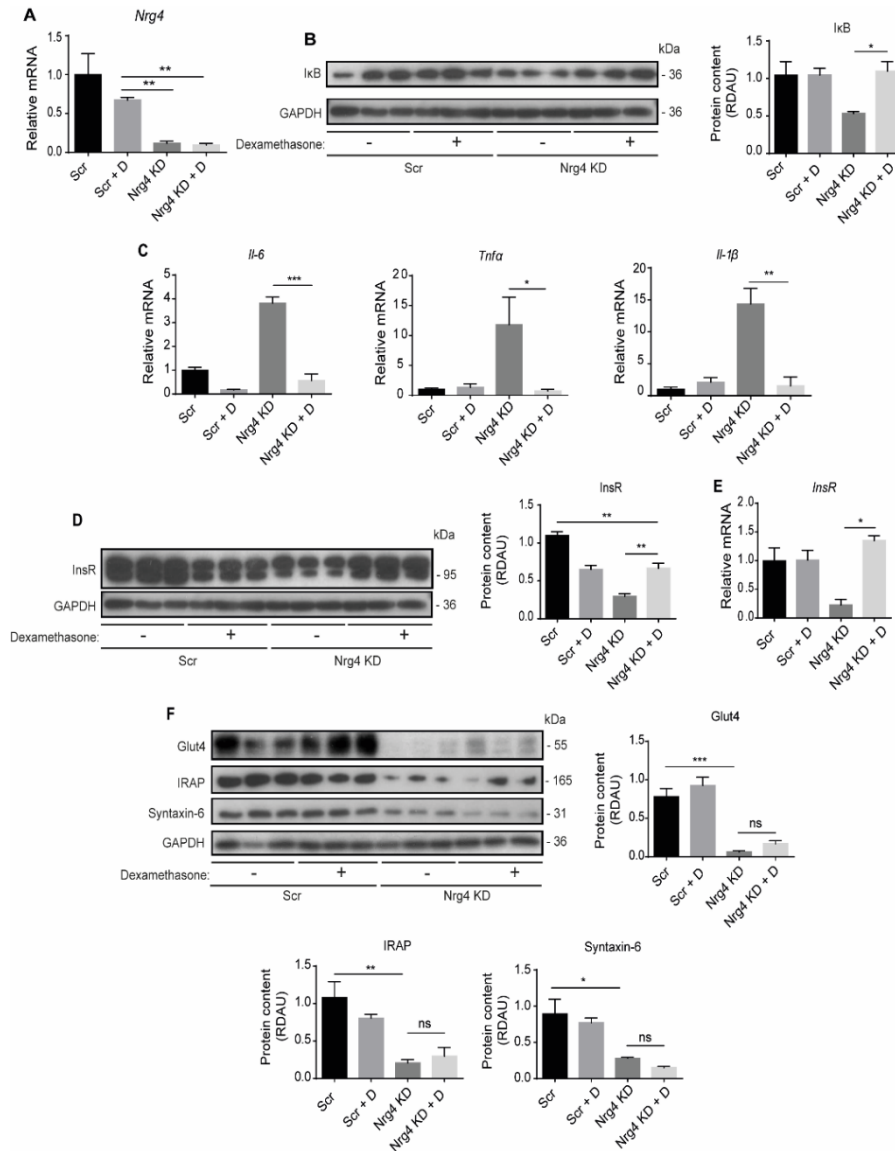

Figure S1. Dexamethasone treatment reverses the cell-autonomous inflammatory phenotype and recovers InsR protein content upon Nrg4 knockdown. Adipocytes were treated with 200 nM dexamethasone (D) at D5 for 48 h. (A) *Nrg4* expression in non-treated or D-treated Scr and Nrg4 KD adipocytes at day 7 (D7) of differentiation (n=3); (B) Western blot bands and quantification of IκB in D-treated or non-treated Scr and Nrg4 KD adipocytes at D7 (n=3); (C) *Tnfa*, *Il-6* and *Il-1β* expression in non-treated or D-treated Scr and Nrg4 KD adipocytes at D7 (n=3); (D) Western blot bands and quantification of InsR in D-treated or non-treated Scr and Nrg4 KD adipocytes at D7 (n=3). The lower band of the InsR blot was quantified. Western blots from panel B and D were performed simultaneously with a common loading control, GAPDH; (E) *InsR* expression in non-treated or D-treated Scr and Nrg4 KD adipocytes at D7 (n=3). All the qPCR values were normalised to those in non-treated Scr D7 adipocytes; (F) Western blot bands and quantification of Glut4, IRAP and Syntaxin-6 in D-treated or non-treated Scr and Nrg4 KD adipocytes at D7 (n=3). Each lane of the blots represents an independent experiment. Overall contrast and brightness of the western blots were adjusted to clarify the images. Data represent mean ± SEM. \*p≤0.05, \*\*p≤0.01, \*\*\*p≤0.001, ns (not significant).

# Supplementary Table S1

**Table S1.** Primer sequences used for quantitative-PCR analyses.

| Target gene                    | Forward sequence        | Reverse sequence            |
|--------------------------------|-------------------------|-----------------------------|
| <i>Adiponectin</i>             | CGGCAGCACTGGCAAGTT      | CCGTGATGTGGTAAGAGAAGTAGTAGA |
| <i>Arp</i>                     | AAGCGCGTCCTGGCATTGTCT   | CCGCAGGGGCAGCAGTGGT         |
| <i>Glut4</i>                   | GTGACTGGAACACTGGTCCTA   | CCAGCCACGTTGCATTGTAG        |
| <i>Il-1<math>\beta</math></i>  | GCACTACAGGCTCCGAGATGAAC | TTGTCGTTGCTTGGTTCTCCTTGT    |
| <i>Ifn<math>\beta</math></i>   | CCCTATGGAGATGACGGAGA    | CCCAGTGCTGGAGAAATTGT        |
| <i>Il-6</i>                    | TAGTCCTTCCTACCCCAATTTCC | TTGGTCCTTAGCCACTCCTTC       |
| <i>Il-10</i>                   | GCTCTTACTGACTGGCATGAG   | CGCAGCTCTAGGAGCATGTG        |
| <i>Irap</i>                    | TTTACCAATGATCGGCTTCAGC  | ICGAACCTCGGGGCTCATATT       |
| <i>Lpl</i>                     | GGGAGTTTGGCTCCAGAGTTT   | TGTGTCTTCAGGGGTCCTTAG       |
| <i>InsR</i>                    | ATGGGCTTCGGGAGAGGAT     | GGATGTCCATAACCAGGGCAC       |
| <i>Nrg1</i>                    | TTCCCATTCTGGCTTGTCTAGT  | CCAGGGTCAAGGTGGGTAG         |
| <i>Nrg4</i>                    | CACGCTGCGAAGAGGTTTTTC   | CGCGATGGTAAGAGTGAGGA        |
| <i>Ppar<math>\gamma</math></i> | CCAGAGCATGGTGCCTTCGCT   | CAGCAACCATTGGGTCAGCTC       |
| <i>Syntaxin-6</i>              | ACAGGCCGTCATGCTAGATG    | GGATGGCTATGGCACACCAC        |
| <i>Tnf<math>\alpha</math></i>  | CCCTCACACTCAGATCATCTTCT | GCTACGACGTGGGCTACAG         |
